# Supplementary material for: Synthesis, radii dependent self-assembly crystal structures and luminescent properties of rare earth (III) complexes with a tripodal salicylic derivative
Source: Royal Society of Chemistry journal article supplement (doi:10.1039/c001780a), 2010-01-01
Supplement: c001780a.pdf [file c001780a.pdf]

## Supporting Information

For

# **Synthesis, radii dependent self-assembly crystal structures and luminescent properties of rare earth (III) complexes with a tripodal salicylic derivative**

Ya-Wen Wang, Yan-Ling Zhang, Wei Dou, Ai-Jiang Zhang, Wen-Wu Qin and  
Wei-Sheng Liu\*

*Key Laboratory of Nonferrous Metals Chemistry and Resources Utilization of Gansu Province,  
State Key Laboratory of Applied Organic Chemistry and College of Chemistry and Chemical  
Engineering, Lanzhou University, Lanzhou 730000, China*

[Liuws@lzu.edu.cn](mailto:Liuws@lzu.edu.cn)

**Table S1** Representative bond lengths (Å) and angles (°) for [La<sub>2</sub>L<sub>2</sub>(DMF)<sub>4</sub>]·4DMF·4EtOH·2H<sub>2</sub>O

|                    |           |                    |           |                     |           |              |          |
|--------------------|-----------|--------------------|-----------|---------------------|-----------|--------------|----------|
| La(1)-O(8)         | 2.472(2)  | La(1)-O(4)         | 2.519(2)  | La(1)-O(12)         | 2.523(3)  | La(1)-O(5)#1 | 2.520(2) |
| La(1)-O(10)        | 2.535(3)  | La(1)-O(13)        | 2.541(3)  | La(1)-O(11)         | 2.593(3)  | La(1)-O(7)#1 | 2.618(2) |
| La(1)-O(8)#1       | 2.700(2)  |                    |           |                     |           |              |          |
| O(8)-La(1)-O(4)    | 78.95(8)  | O(12)-La(1)-O(13)  | 73.80(9)  | O(5)#1-La(1)-O(7)#1 | 84.78(8)  |              |          |
| O(8)-La(1)-O(12)   | 148.06(8) | O(5)#1-La(1)-O(13) | 71.46(8)  | O(10)-La(1)-O(7)#1  | 143.08(8) |              |          |
| O(4)-La(1)-O(12)   | 75.02(9)  | O(10)-La(1)-O(13)  | 117.78(9) | O(13)-La(1)-O(7)#1  | 76.68(9)  |              |          |
| O(8)-La(1)-O(5)#1  | 69.39(7)  | O(8)-La(1)-O(11)   | 85.03(8)  | O(11)-La(1)-O(7)#1  | 152.23(8) |              |          |
| O(4)-La(1)-O(5)#1  | 131.64(8) | O(4)-La(1)-O(11)   | 120.68(9) | O(8)-La(1)-O(8)#1   | 70.85(8)  |              |          |
| O(12)-La(1)-O(5)#1 | 142.54(8) | O(12)-La(1)-O(11)  | 92.53(10) | O(4)-La(1)-O(8)#1   | 65.66(7)  |              |          |
| O(8)-La(1)-O(10)   | 75.82(8)  | O(5)#1-La(1)-O(11) | 92.51(9)  | O(12)-La(1)-O(8)#1  | 113.37(9) |              |          |
| O(4)-La(1)-O(10)   | 69.93(8)  | O(10)-La(1)-O(11)  | 50.77(9)  | O(5)#1-La(1)-O(8)#1 | 69.81(8)  |              |          |
| O(12)-La(1)-O(10)  | 78.07(9)  | O(13)-La(1)-O(11)  | 76.27(9)  | O(10)-La(1)-O(8)#1  | 128.20(8) |              |          |
| O(5)#1-La(1)-O(10) | 131.30(8) | O(8)-La(1)-O(7)#1  | 119.27(7) | O(13)-La(1)-O(8)#1  | 113.83(8) |              |          |
| O(8)-La(1)-O(13)   | 135.47(8) | O(4)-La(1)-O(7)#1  | 79.85(8)  | O(11)-La(1)-O(8)#1  | 153.76(8) |              |          |
| O(4)-La(1)-O(13)   | 145.03(8) | O(12)-La(1)-O(7)#1 | 73.94(9)  | O(7)#1-La(1)-O(8)#1 | 48.56(7)  |              |          |

Symmetry transformations used to generate equivalent atoms: #1 1-x, 1-y, 2-z

**Table S2** Representative bond lengths (Å) and angles (°) for [Eu<sub>2</sub>L<sub>2</sub>(DMF)<sub>4</sub>]·2DMF

|                 |           |                  |           |                  |           |           |          |
|-----------------|-----------|------------------|-----------|------------------|-----------|-----------|----------|
| Eu-O(7)         | 2.375(2)  | Eu-O(4)          | 2.431(2)  | Eu-O(11)         | 2.449(2)  | Eu-O(8)#1 | 2.495(2) |
| Eu-O(10)        | 2.428(2)  | Eu-O(13)         | 2.440(2)  | Eu-O(12)         | 2.459(2)  | Eu-O(7)#1 | 2.645(2) |
| Eu-O(5)#1       | 2.429(2)  |                  |           |                  |           |           |          |
| O(7)-Eu-O(10)   | 75.29(7)  | O(5)#1-Eu-O(11)  | 87.96(8)  | O(4)-Eu-O(8)#1   | 80.25(7)  |           |          |
| O(7)-Eu-O(5)#1  | 72.37(7)  | O(4)-Eu-O(11)    | 124.11(7) | O(13)-Eu-O(8)#1  | 74.74(8)  |           |          |
| O(10)-Eu-O(5)#1 | 131.66(7) | O(13)-Eu-O(11)   | 93.26(8)  | O(11)-Eu-O(8)#1  | 149.86(7) |           |          |
| O(7)-Eu-O(4)    | 78.18(7)  | O(7)-Eu-O(12)    | 139.05(8) | O(12)-Eu-O(8)#1  | 75.12(8)  |           |          |
| O(10)-Eu-O(4)   | 70.85(7)  | O(10)-Eu-O(12)   | 115.41(8) | O(7)-Eu-O(7)#1   | 71.26(7)  |           |          |
| O(5)#1-Eu-O(4)  | 133.37(7) | O(5)#1-Eu-O(12)  | 72.34(7)  | O(10)-Eu-O(7)#1  | 129.19(7) |           |          |
| O(7)-Eu-O(13)   | 145.88(7) | O(4)-Eu-O(12)    | 142.54(7) | O(5)#1-Eu-O(7)#1 | 70.93(7)  |           |          |
| O(10)-Eu-O(13)  | 75.80(8)  | O(13)-Eu-O(12)   | 71.07(8)  | O(4)-Eu-O(7)#1   | 65.71(7)  |           |          |
| O(5)#1-Eu-O(13) | 141.66(8) | O(11)-Eu-O(12)   | 74.84(8)  | O(13)-Eu-O(7)#1  | 115.61(7) |           |          |
| O(4)-Eu-O(13)   | 75.50(8)  | O(7)-Eu-O(8)#1   | 121.53(7) | O(11)-Eu-O(7)#1  | 151.06(7) |           |          |
| O(7)-Eu-O(11)   | 83.81(8)  | O(10)-Eu-O(8)#1  | 142.87(8) | O(12)-Eu-O(7)#1  | 115.00(7) |           |          |
| O(10)-Eu-O(11)  | 53.41(7)  | O(5)#1-Eu-O(8)#1 | 85.25(8)  | O(8)#1-Eu-O(7)#1 | 50.33(6)  |           |          |

Symmetry transformations used to generate equivalent atoms: #1 2-x, 1-y, 1-z

**Table S3** Representative bond lengths (Å) and angles (°) for  $\{[\text{GdL}(\text{DMF})(\text{H}_2\text{O})_2]\cdot\text{DMF}\}_\infty$

|                    |            |                     |            |                   |            |              |          |
|--------------------|------------|---------------------|------------|-------------------|------------|--------------|----------|
| Gd(1)-O(12)        | 2.378(5)   | Gd(1)-O(13)         | 2.389(4)   | Gd(1)-O(14)       | 2.399(4)   | Gd(1)-O(8)#1 | 2.411(5) |
| Gd(1)-O(1)         | 2.452(5)   | Gd(1)-O(5)          | 2.473(5)   | Gd(1)-O(7)#1      | 2.474(4)   | Gd(1)-O(2)   | 2.491(5) |
| Gd(1)-O(4)         | 2.514(5)   |                     |            |                   |            |              |          |
| O(12)-Gd(1)-O(13)  | 82.4(2)    | O(14)-Gd(1)-O(5)    | 124.56(18) | O(8)#1-Gd(1)-O(2) | 78.53(16)  |              |          |
| O(12)-Gd(1)-O(14)  | 83.99(19)  | O(8)#1-Gd(1)-O(5)   | 147.87(18) | O(1)-Gd(1)-O(2)   | 52.28(15)  |              |          |
| O(13)-Gd(1)-O(14)  | 150.84(15) | O(1)-Gd(1)-O(5)     | 95.06(18)  | O(5)-Gd(1)-O(2)   | 73.43(17)  |              |          |
| O(12)-Gd(1)-O(8)#1 | 126.45(18) | O(12)-Gd(1)-O(7)#1  | 73.70(18)  | O(7)#1-Gd(1)-O(2) | 126.74(17) |              |          |
| O(13)-Gd(1)-O(8)#1 | 82.21(18)  | O(13)-Gd(1)-O(7)#1  | 78.09(16)  | O(12)-Gd(1)-O(4)  | 76.5(2)    |              |          |
| O(14)-Gd(1)-O(8)#1 | 85.40(18)  | O(14)-Gd(1)-O(7)#1  | 73.38(16)  | O(13)-Gd(1)-O(4)  | 126.72(17) |              |          |
| O(12)-Gd(1)-O(1)   | 146.5(2)   | O(8)#1-Gd(1)-O(7)#1 | 52.99(16)  | O(14)-Gd(1)-O(4)  | 74.15(16)  |              |          |
| O(13)-Gd(1)-O(1)   | 125.98(16) | O(1)-Gd(1)-O(7)#1   | 124.90(17) | O(8)#1-Gd(1)-O(4) | 147.88(18) |              |          |
| O(14)-Gd(1)-O(1)   | 76.94(16)  | O(5)-Gd(1)-O(7)#1   | 139.93(17) | O(1)-Gd(1)-O(4)   | 71.95(18)  |              |          |
| O(8)#1-Gd(1)-O(1)  | 79.56(17)  | O(12)-Gd(1)-O(2)    | 143.27(18) | O(5)-Gd(1)-O(4)   | 51.79(17)  |              |          |
| O(12)-Gd(1)-O(5)   | 73.41(19)  | O(13)-Gd(1)-O(2)    | 74.43(16)  | O(7)#1-Gd(1)-O(4) | 137.59(17) |              |          |
| O(13)-Gd(1)-O(5)   | 75.47(18)  | O(14)-Gd(1)-O(2)    | 128.54(16) | O(2)-Gd(1)-O(4)   | 94.94(17)  |              |          |

Symmetry transformations used to generate equivalent atoms:

#1 x, -y+3/2, z+1/2

**Table S4** Representative bond lengths (Å) and angles (°) for  $\{[\text{TbL}(\text{DMF})(\text{H}_2\text{O})_2]\cdot\text{DMF}\}_\infty$

|                    |            |                     |            |                   |            |              |          |
|--------------------|------------|---------------------|------------|-------------------|------------|--------------|----------|
| Tb(1)-O(12)        | 2.359(3)   | Tb(1)-O(13)         | 2.369(3)   | Tb(1)-O(14)       | 2.388(3)   | Tb(1)-O(8)#1 | 2.399(3) |
| Tb(1)-O(1)         | 2.436(3)   | Tb(1)-O(5)          | 2.466(3)   | Tb(1)-O(7)#1      | 2.471(3)   | Tb(1)-O(2)   | 2.479(3) |
| Tb(1)-O(4)         | 2.504(3)   |                     |            |                   |            |              |          |
| O(12)-Tb(1)-O(13)  | 82.23(13)  | O(14)-Tb(1)-O(5)    | 124.32(11) | O(8)#1-Tb(1)-O(2) | 78.03(11)  |              |          |
| O(12)-Tb(1)-O(14)  | 83.46(13)  | O(8)#1-Tb(1)-O(5)   | 147.53(11) | O(1)-Tb(1)-O(2)   | 52.46(10)  |              |          |
| O(13)-Tb(1)-O(14)  | 150.48(10) | O(1)-Tb(1)-O(5)     | 95.18(13)  | O(5)-Tb(1)-O(2)   | 73.63(12)  |              |          |
| O(12)-Tb(1)-O(8)#1 | 126.74(11) | O(12)-Tb(1)-O(7)#1  | 73.79(12)  | O(7)#1-Tb(1)-O(2) | 126.55(11) |              |          |
| O(13)-Tb(1)-O(8)#1 | 82.15(13)  | O(13)-Tb(1)-O(7)#1  | 77.86(10)  | O(12)-Tb(1)-O(4)  | 76.18(13)  |              |          |
| O(14)-Tb(1)-O(8)#1 | 86.00(12)  | O(14)-Tb(1)-O(7)#1  | 73.40(10)  | O(13)-Tb(1)-O(4)  | 127.05(11) |              |          |
| O(12)-Tb(1)-O(1)   | 146.13(12) | O(8)#1-Tb(1)-O(7)#1 | 53.20(10)  | O(14)-Tb(1)-O(4)  | 73.54(11)  |              |          |
| O(13)-Tb(1)-O(1)   | 126.59(10) | O(1)-Tb(1)-O(7)#1   | 124.78(11) | O(8)#1-Tb(1)-O(4) | 147.78(12) |              |          |
| O(14)-Tb(1)-O(1)   | 76.98(11)  | O(5)-Tb(1)-O(7)#1   | 139.94(11) | O(1)-Tb(1)-O(4)   | 71.91(12)  |              |          |
| O(8)#1-Tb(1)-O(1)  | 79.49(12)  | O(12)-Tb(1)-O(2)    | 143.55(12) | O(5)-Tb(1)-O(4)   | 52.20(10)  |              |          |
| O(12)-Tb(1)-O(5)   | 73.42(13)  | O(13)-Tb(1)-O(2)    | 74.82(10)  | O(7)#1-Tb(1)-O(4) | 137.21(11) |              |          |
| O(13)-Tb(1)-O(5)   | 75.49(11)  | O(14)-Tb(1)-O(2)    | 128.77(10) | O(2)-Tb(1)-O(4)   | 95.44(11)  |              |          |

Symmetry transformations used to generate equivalent atoms:

#1 x, -y+3/2, z+1/2

**Table S5** Representative bond lengths (Å) and angles (°) for  $\{[YL(DMF)(H_2O)_2] \cdot DMF\}_\infty$

|                   |            |                   |            |                    |            |             |          |
|-------------------|------------|-------------------|------------|--------------------|------------|-------------|----------|
| Y(1)-O(12)        | 2.337(4)   | Y(1)-O(13)        | 2.331(4)   | Y(1)-O(14)         | 2.358(4)   | Y(1)-O(8)#1 | 2.369(4) |
| Y(1)-O(1)         | 2.411(4)   | Y(1)-O(5)         | 2.438(4)   | Y(1)-O(2)          | 2.457(4)   | Y(1)-O(7)#1 | 2.463(4) |
| Y(1)-O(4)         | 2.482(4)   |                   |            |                    |            |             |          |
| O(13)-Y(1)-O(12)  | 82.02(16)  | O(14)-Y(1)-O(5)   | 124.75(15) | O(8)#1-Y(1)-O(7)#1 | 53.88(13)  |             |          |
| O(13)-Y(1)-O(14)  | 149.86(13) | O(8)#1-Y(1)-O(5)  | 146.73(15) | O(1)-Y(1)-O(7)#1   | 124.45(15) |             |          |
| O(12)-Y(1)-O(14)  | 83.51(16)  | O(1)-Y(1)-O(5)    | 95.48(16)  | O(5)-Y(1)-O(7)#1   | 139.98(15) |             |          |
| O(13)-Y(1)-O(8)#1 | 81.87(15)  | O(13)-Y(1)-O(2)   | 74.93(14)  | O(2)-Y(1)-O(7)#1   | 126.47(15) |             |          |
| O(12)-Y(1)-O(8)#1 | 127.44(15) | O(12)-Y(1)-O(2)   | 143.33(15) | O(13)-Y(1)-O(4)    | 127.80(15) |             |          |
| O(14)-Y(1)-O(8)#1 | 86.23(15)  | O(14)-Y(1)-O(2)   | 129.07(14) | O(12)-Y(1)-O(4)    | 76.16(16)  |             |          |
| O(13)-Y(1)-O(1)   | 127.25(14) | O(8)#1-Y(1)-O(2)  | 77.31(14)  | O(14)-Y(1)-O(4)    | 73.25(15)  |             |          |
| O(12)-Y(1)-O(1)   | 145.97(16) | O(1)-Y(1)-O(2)    | 53.10(13)  | O(8)#1-Y(1)-O(4)   | 147.27(15) |             |          |
| O(14)-Y(1)-O(1)   | 76.66(14)  | O(5)-Y(1)-O(2)    | 73.39(15)  | O(1)-Y(1)-O(4)     | 71.80(15)  |             |          |
| O(8)#1-Y(1)-O(1)  | 78.91(15)  | O(13)-Y(1)-O(7)#1 | 77.50(13)  | O(5)-Y(1)-O(4)     | 52.90(14)  |             |          |
| O(13)-Y(1)-O(5)   | 75.64(15)  | O(12)-Y(1)-O(7)#1 | 73.85(15)  | O(2)-Y(1)-O(4)     | 95.88(15)  |             |          |
| O(12)-Y(1)-O(5)   | 73.50(16)  | O(14)-Y(1)-O(7)#1 | 73.12(14)  | O(7)#1-Y(1)-O(4)   | 136.81(15) |             |          |

Symmetry transformations used to generate equivalent atoms:

#1 x, -y+3/2, z+1/2

**Table S6** Photophysical characterization of the europium and terbium complexes

|          |     | $\lambda_{\max}^a$ /nm | RFI/a.u. | $\tau$ /ms | $\Phi^b$ (%) |
|----------|-----|------------------------|----------|------------|--------------|
| <b>L</b> | Eu  | 579                    | 57       |            |              |
|          |     | 591                    | 100      |            |              |
|          |     | 614                    | 259      | 0.374      | 1.32         |
| Tb       | 491 | 2194                   |          |            |              |
|          | 545 | 7413                   | 1.07     | 43.47      |              |
|          | 584 | 484                    |          |            |              |
|          | 620 | 184                    |          |            |              |

<sup>a</sup> Excitation and emission passes = 2.5 nm. <sup>b</sup> Luminescence lifetimes and quantum yield values are reported here with an error of  $\pm 10\%$ .

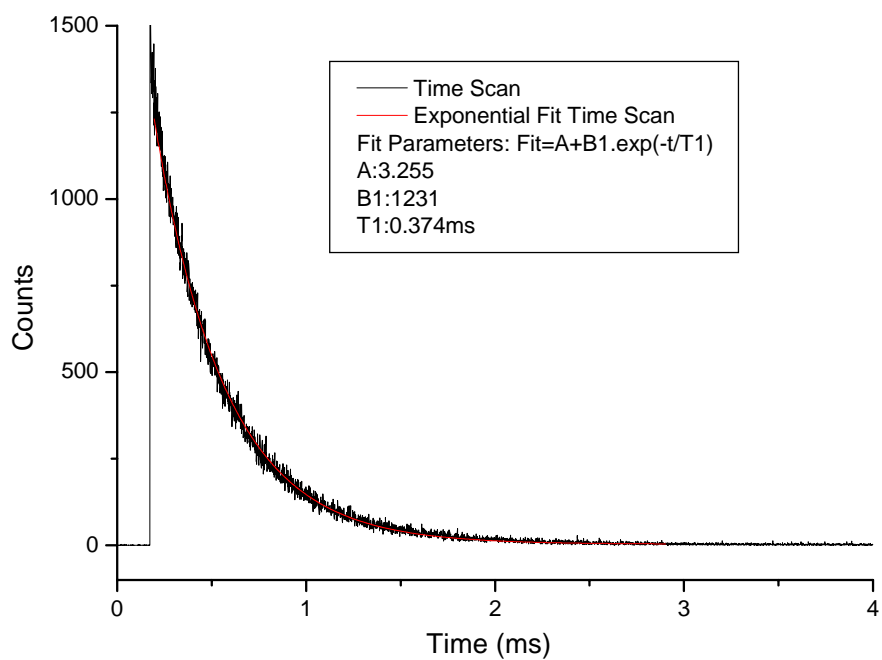

**Fig. S1** The room-temperature solid-state phosphorescence lifetime of  $\text{Eu}^{3+}$  complex.

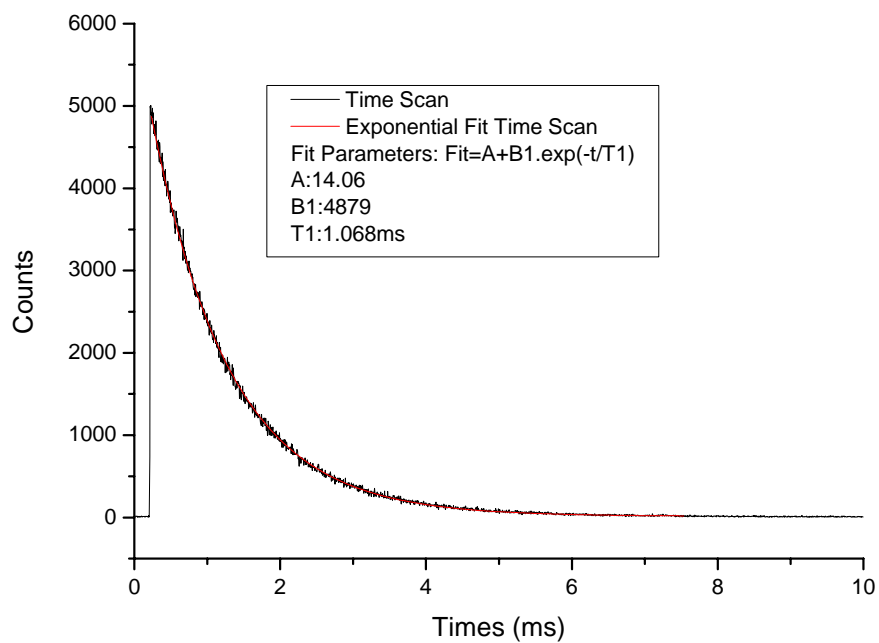

**Fig. S2** The room-temperature solid-state phosphorescence lifetime of  $\text{Tb}^{3+}$  complex.

### UV-Vis Spectrum of Ligand.

The UV-Vis absorption spectrum of the free ligand **LH<sub>3</sub>** (Figure S3) was measured in DMF solution ( $c = 1.0 \times 10^{-4}$  M). The maximum absorption band at 292 nm is attributed to singlet-singlet  $\pi$ - $\pi^*$  salicylic acid group absorption of the ligand. The molar absorption coefficient ( $\epsilon$ ) is calculated as  $8.6 \times 10^3$  L · mol<sup>-1</sup> · cm<sup>-1</sup>, revealing that the ligand has a strong ability of absorbing light and thus favor efficient antenna effect, making them potential candidates as sensitizing compound for lanthanide luminescence. A weak band at 262 nm is also evident, which is the absorption of DMF.

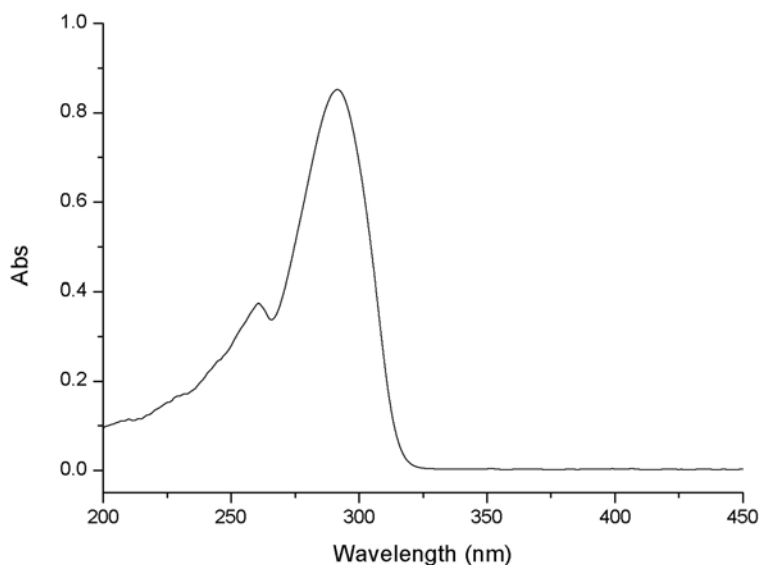

**Fig. S3** Absorption spectra of LH<sub>3</sub> in DMF ( $1.0 \times 10^{-4}$  M).

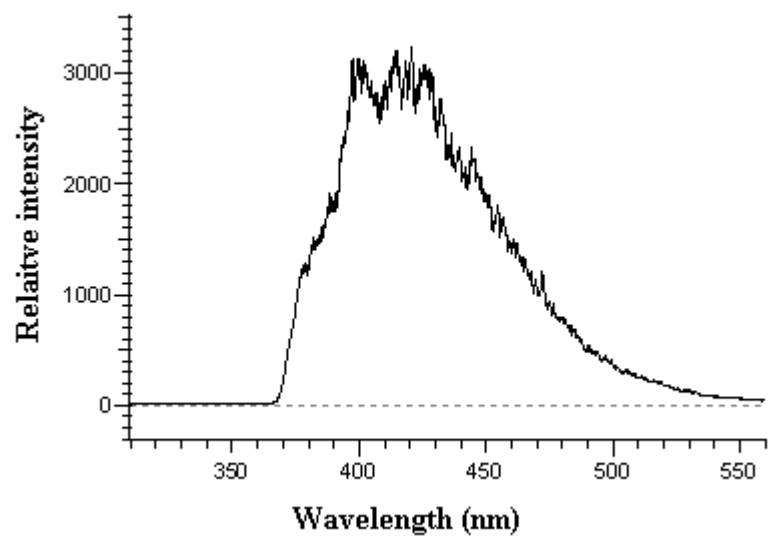

**Fig. S4** Phosphorescence spectrum of Gd<sup>3+</sup> complex excited at 300 nm at 77K.
